# Supplementary material for: Hepatic Ischemia-Reperfusion Impairs Blood-Brain Barrier Partly Due to Release of Arginase From Injured Liver
Source: Front Pharmacol. 2021 Oct 13;12:724471. doi: 10.3389/fphar.2021.724471 (PMC8548691; doi:10.3389/fphar.2021.724471)
Supplement: Supplementary file 4 [file DataSheet8.ZIP]

Archive with 40 entries (27 files):
- Immunofluorescence (Figure 6G, part3)/
- Immunofluorescence (Figure 6G, part3)/13/
- Immunofluorescence (Figure 6G, part3)/13/1/
- Immunofluorescence (Figure 6G, part3)/13/1/5s_c1+2.tif
- Immunofluorescence (Figure 6G, part3)/13/1/5s_c1.tif
- Immunofluorescence (Figure 6G, part3)/13/1/5s_c2.tif
- Immunofluorescence (Figure 6G, part3)/13/2/
- Immunofluorescence (Figure 6G, part3)/13/2/6s_c1+2.tif
- Immunofluorescence (Figure 6G, part3)/13/2/6s_c1.tif
- Immunofluorescence (Figure 6G, part3)/13/2/6s_c2.tif
- Immunofluorescence (Figure 6G, part3)/13/3/
- Immunofluorescence (Figure 6G, part3)/13/3/7s_c1+2.tif
- Immunofluorescence (Figure 6G, part3)/13/3/7s_c1.tif
- Immunofluorescence (Figure 6G, part3)/13/3/7s_c2.tif
- Immunofluorescence (Figure 6G, part3)/14 (presented in manuscript)/
- Immunofluorescence (Figure 6G, part3)/14 (presented in manuscript)/1 (presented in manuscript)/
- Immunofluorescence (Figure 6G, part3)/14 (presented in manuscript)/1 (presented in manuscript)/5S_c1+2.tif
- Immunofluorescence (Figure 6G, part3)/14 (presented in manuscript)/1 (presented in manuscript)/5S_c1.tif
- Immunofluorescence (Figure 6G, part3)/14 (presented in manuscript)/1 (presented in manuscript)/5S_c2.tif
- Immunofluorescence (Figure 6G, part3)/14 (presented in manuscript)/2/
- Immunofluorescence (Figure 6G, part3)/14 (presented in manuscript)/2/6S_c1+2.tif
- Immunofluorescence (Figure 6G, part3)/14 (presented in manuscript)/2/6S_c1.tif
- Immunofluorescence (Figure 6G, part3)/14 (presented in manuscript)/2/6S_c2.tif
- Immunofluorescence (Figure 6G, part3)/14 (presented in manuscript)/3/
- Immunofluorescence (Figure 6G, part3)/14 (presented in manuscript)/3/7S_c1+2.tif
- Immunofluorescence (Figure 6G, part3)/14 (presented in manuscript)/3/7S_c1.tif
- Immunofluorescence (Figure 6G, part3)/14 (presented in manuscript)/3/7S_c2.tif
- Immunofluorescence (Figure 6G, part3)/15/
- Immunofluorescence (Figure 6G, part3)/15/1/
- Immunofluorescence (Figure 6G, part3)/15/1/1S_c1+2.tif
- Immunofluorescence (Figure 6G, part3)/15/1/1S_c1.tif
- Immunofluorescence (Figure 6G, part3)/15/1/1S_c2.tif
- Immunofluorescence (Figure 6G, part3)/15/2/
- Immunofluorescence (Figure 6G, part3)/15/2/2S_c1+2.tif
- Immunofluorescence (Figure 6G, part3)/15/2/2S_c1.tif
- Immunofluorescence (Figure 6G, part3)/15/2/2S_c2.tif
- Immunofluorescence (Figure 6G, part3)/15/3/
- Immunofluorescence (Figure 6G, part3)/15/3/3S_c1+2.tif
- Immunofluorescence (Figure 6G, part3)/15/3/3S_c1.tif
- Immunofluorescence (Figure 6G, part3)/15/3/3S_c2.tif
